# Supplementary material
Source: Springer Nature journal article supplement (https://www.springermedizin.de/resource/supplementary/13054_2010_8822_MOESM3_ESM.pdf/9732650)

**CO<sub>2</sub> (l/min)**

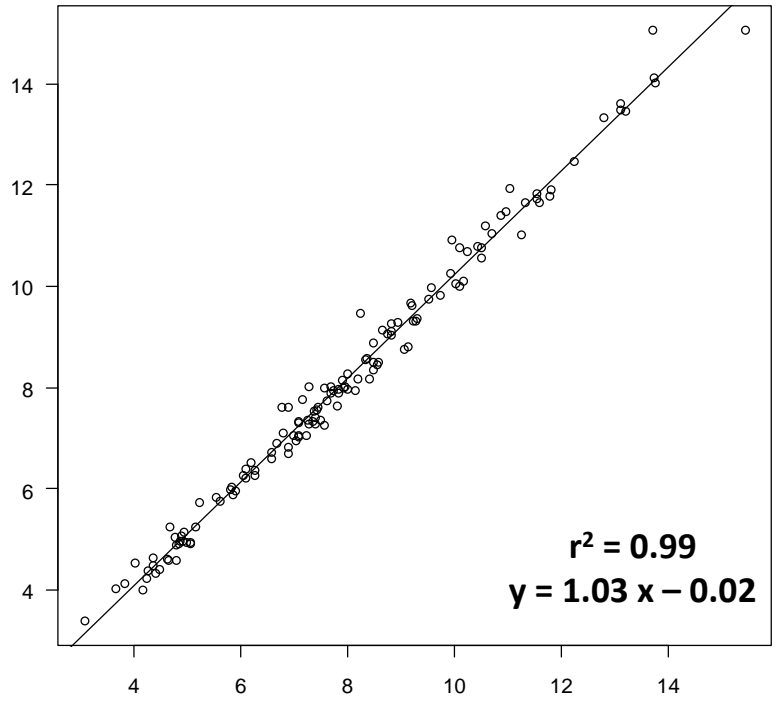

**CO<sub>1</sub> (l/min)**

**CO<sub>2</sub> - CO<sub>1</sub> (l/min)**

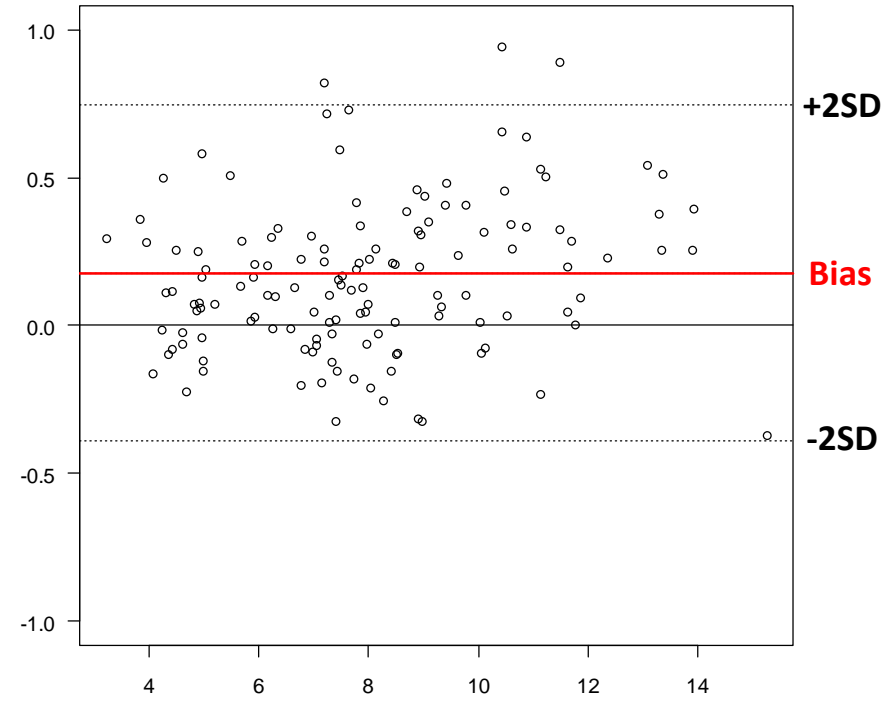

**Average CO<sub>1</sub> & CO<sub>2</sub> (l/min)**

Supplement: MOESM3 [file 9732650]
